# Supplementary material for: Phenolic Fingerprint, Bioactivity and Nanoformulation of Prunus spinosa L. Fruit Extract for Skin Delivery
Source: MDPI journal article supplement (doi:10.3390/pharmaceutics15041063), 2023-03-25
Supplement: s1 [file s1]

Supplementary Material

# Phenolic Fingerprint, Bioactivity and Nanoformulation of *Prunus spinosa* L. Fruit Extract for Skin Delivery

Maria De Luca <sup>1,2</sup>, Carlo Ignazio Giovanni Tuberioso <sup>3</sup>, Ramon Pons <sup>4</sup>, María Teresa García <sup>4</sup>,  
Maria del Carmen Morán <sup>5,6</sup>, Giulio Ferino <sup>7</sup>, Antonio Vassallo <sup>1,8</sup>, Giuseppe Martelli <sup>1</sup>, Carla Caddeo <sup>3,\*</sup>

<sup>1</sup> Department of Science, University of Basilicata, Viale dell'Ateneo Lucano 10, 85100 Potenza, Italy

<sup>2</sup> KAMABIO Srl, Via Al Boschetto 4/B, 39100 Bolzano, Italy

<sup>3</sup> Department of Life and Environmental Sciences, University of Cagliari, SS 554 – bivio per Sestu, Monserrato, 09042 Cagliari, Italy

<sup>4</sup> Department of Surfactants and Nanobiotechnology, Institute for Advanced Chemistry of Catalonia (IQAC-CSIC), c/Jordi Girona, 18-26, 08034 Barcelona, Spain

<sup>5</sup> Department of Biochemistry and Physiology, Physiology section, Faculty of Pharmacy and Food Science, University of Barcelona, Avda. Joan XXIII 27-31, 08028 Barcelona, Spain

<sup>6</sup> Institute of Nanoscience and Nanotechnology - IN2UB, University of Barcelona, Avda. Diagonal, 645, 08028 Barcelona, Spain

<sup>7</sup> CeSAR, University of Cagliari, SS 554 – bivio per Sestu, Monserrato, 09042 Cagliari, Italy

<sup>8</sup> Spinoff TNcKILLERS s.r.l., Viale dell'Ateneo Lucano 10, 85100 Potenza, Italy

\* Correspondence: caddeoc@unica.it

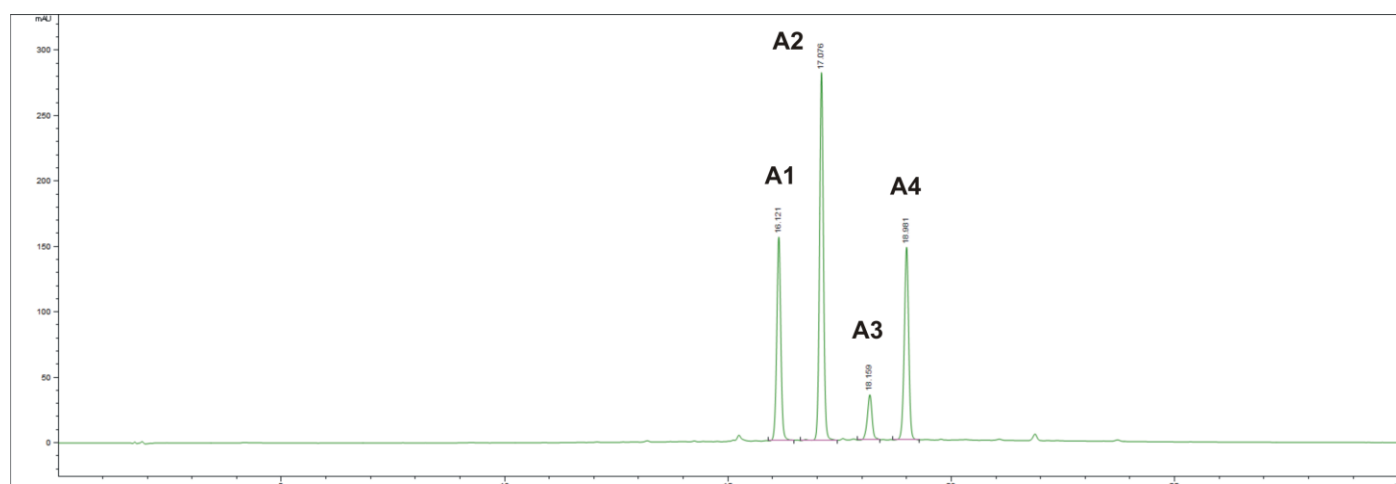

**Figure S1.** LC-DAD chromatogram of *P. spinosa* extract at  $\lambda = 520$  nm. Peaks identification: A1: cyanidin-3-*O*-glucoside, A2: cyanidin-3-*O*-rutinoside, A3: peonidin-3-*O*-glucoside, and A4: peonidin-3-*O*-rutinoside. Chromatographic conditions are reported in the main text.
